# Supplementary material for: Assessing the Gun Violence Archive as an Epidemiologic Data Source for Community Firearm Violence in 4 US Cities
Source: PubMed Central journal article supplement (PMC10238941; doi:10.1001/jamanetworkopen.2023.16545), 2023-06-02
Supplement: jamanetwopen-e2316545-s001.pdf [file jamanetwopen-e2316545-s001.pdf]

## Data Sharing Statement

Gobaud. Assessing the Gun Violence Archive as an Epidemiologic Data Source for Community Firearm Violence in 4 US Cities. *JAMA Netw Open*. Published June 02, 2023.  
doi:10.1001/jamanetworkopen.2023.16545

### Data

**Data available:**All data used for this study are publicly available. The dataset used in this study may be made available upon reasonable request to the corresponding author.
